# Supplementary material for: Inhibiting Neddylation with MLN4924 Suppresses Growth and Delays Multicellular Development in Dictyostelium discoideum
Source: Biomolecules. 2021 Mar 23;11(3):482. doi: 10.3390/biom11030482 (PMC8005062; doi:10.3390/biom11030482)
Supplement: Supplementary file 1 [file biomolecules-11-00482-s001.xlsx]

## Sheet: Table S1
	Table S1. D.discoideum proteins orthologous to human cullin proteins
	Human cullin protein	Size (aa)	D.discoideum cullin protein (dictyBase protein ID)	Size (aa)	Region of similarity (aa)	Identities (%)	Positives (%)	E-value
	CUL1	752	CulA (DDB0185191)	770	764	52	68	0
	CUL1	752	CulB (DDB0191260)	771	769	38	59	2e-174
	CUL3	768	CulC (DDB0266742)	769	747	48	66	0
	CUL4A	759	CulD (DDB0266743)	802	754	47	64	0
	CUL1	752	CulE (DDB0266744)	750	747	33	56	3e-132
	BlastP parameters (dictyBase): E-value, 0.1; Matrix, BLOSUM62; Filter, no

## Sheet: Table S2
	Table S2. D.discoideum proteins orthologous to human proteins involved in the neddylation pathway
	Human protein	Size (aa)	D.discoideum ortholog (dictyBase protein ID)	Size (aa)	Region of similarity (aa)	Identities (%)	Positives (%)	E-value
	NEDD8 processing
	DEN1/SENP8	212	Senp8 (DDB0304995)	243	210	32	47	4e-26
	UCHL1	223	Uch1 (DDB0304593)	255	215	47	66	3e-54
	UCHL3	230	Uch1 (DDB0304593)	255	223	52	70	1e-65
	UCHL5	329	Uch2 (DDB0233072)	343	326	44	64	3e-77
	NAE heterodimer
	APPBP1/NAE1	534	Nae1 (DDB0237981)	520	523	41	64	1e-123
	UBA3	463	Ube1c (DDB0238040)	442	434	49	68	1e-128
	E2 protein
	UBE2M/UBC12 (isoform 1)	183	Ube2m (DDB0238042)	230	178	53	73	1e-54
	UBE2F	185			175	33	53	6e-24
	E3 protein
	RBX1/ROC1	108	Rbx1 (DDB0231276)	104	97	86	92	2e-42
	DCUN1D1	259	Unnamed (DDB0305617)	249	248	37	56	6e-43
	CSN subunits
	CSN1/GPS1	491	Csn1 (DDB0233099)	458	435	45	63	1e-102
	CSN2/TRIP15	443	Csn2 (DDB0233100)	449	413	63	79	1e-143
	CSN3	423	Csn3 (DDB0233101)	418	377	40	61	2e-76
	CSN4	406	Csn4 (DDB0233102)	393	383	47	71	9e-95
	CSN5/JAB1	334	Csn5 (DDB0233103)	332	330	66	81	1e-130
	HVIP/CSN6	327	Csn6 (DDB0233105)	309	284	41	64	2e-61
	CSN7A/DERP10	275	Csn7 (DDB0233106)	259	194	41	68	1e-43
	CSN8	209	Csn8 (DDB0233107)	196	200	30	54	1e-24
	CSNAP/CSN9	57	Could not be identified	-	-	-	-	-
	BlastP parameters (dictyBase): E-value, 0.1; Matrix, BLOSUM62; Filter, no
